# Supplementary material for: Inhibitory Role of an Aeromonas hydrophila TIR Domain Effector in Antibacterial Immunity by Targeting TLR Signaling Complexes in Zebrafish
Source: Frontiers journal article supplement (doi:10.3389/fmicb.2021.694081), 2021-07-08
Supplement: Data_Sheet_1.pdf [file Data_Sheet_1.pdf]

## ***Supplementary Material***

**Supplementary Table 1**  
**Strain and accession numbers and localization of *tcpAh* in**  
**genome of *Aeromonas hydrophila* (NCBI)**

| <b>Strain no.</b> | <b>Accession no.</b> | <b>Localization</b>                 |
|-------------------|----------------------|-------------------------------------|
| JBN2301           | CP013178.1           | AS145_07865                         |
| ZYAH72            | CP016989.1           | BFW97_07865                         |
| D4                | CP013965.1           | AhyD4_07830                         |
| LHW39             | CP050012.1           | G9455_08240                         |
| NJ-35             | CP006870.1           | Between U876_07580 and U876_07590   |
| J-1               | CP006883.1           | Between V469_07605 and V469_07620   |
| pc104A            | CP007576.1           | Between V429_15525 and V429_15545   |
| AL09-71           | CP007566.1           | Between V428_15495 and V428_15510   |
| ML09-119          | CP005966.1           | Between AHML_14990 and AHML_14995   |
| GYK1              | CP016392.1           | Between A9258_07570 and A9258_07575 |
